# Supplementary material
Source: PubMed Central journal article supplement (PMC8902686)
Supplement: jamaneurol-e220074-s003.pdf [file jamaneurol-e220074-s003.pdf]

## Data Sharing Statement

Dolui. Association of Intensive vs Standard Blood Pressure Control With Cerebral Blood Flow. *JAMA Neurol.* Published March 07, 2022. doi:10.1001/jamaneurol.2022.0074

### Data

**Data available:** Yes

**Data types:** Deidentified participant data

**How to access data:** <https://biolincc.nhlbi.nih.gov/studies/sprint/>

**When available:** beginning date: 06-30-2022

### Supporting Documents

**Document types:** None

### Additional Information

**Who can access the data:** Anyone requesting the data

**Types of analyses:** For any purpose

**Mechanisms of data availability:** Without investigator support
